# Supplementary material for: Quantitative genetic analysis of the bTB diagnostic single intradermal comparative cervical test (SICCT)
Source: PubMed Central journal article supplement (PMC5123354; doi:10.1186/s12711-016-0264-3), 2016-11-24
Supplement: 12711_2016_264_MOESM2_ESM.pdf [file 12711_2016_264_MOESM2_ESM.pdf]

**Additional file 2***Assessment of the numbers of false positives and negatives within the data.*

The data used for detailed analysis contained 89,243 individuals: 1243 presumed cases (R's) and 88,000 presumed healthy (NR+IR), with an apparent prevalence  $p' = 1.4\%$ . Table S1 considers the 2x2 contingency table classifying diseased and test results for two values of  $Se$  for a single SICCT test, 0.55 and 0.65, which are in the lower range of published values [1] and two values of  $Sp$ , 0.9998 and 0.9991. The values for  $Sp$  are those obtained for the standard and severe interpretations of SICCT taken from [23]. It shows the false positives are likely to be very few in number and unlikely to exceed 6.1% of the observed R (positives), and the false negatives are unlikely to exceed 1.4% of the combined NR and IR (negatives).

**Table S1.** The distribution of true and false positives for different values of  $Se$  and  $Sp$ . The true prevalence is estimated using the standard epidemiological formula  $p_{TB} = (p' + Sp - 1) / (Se + Sp - 1)$ . The % given corresponds to the total number of 88,932 individuals. (a)  $Se = 0.55$ ,  $Sp = 0.9991$  and  $p_{TB} = 0.0266$ ; (b)  $Se = 0.55$ ,  $Sp = 0.9998$  and  $p_{TB} = 0.0280$ ; (c)  $Se = 0.65$ ,  $Sp = 0.9991$  and  $p_{TB} = 0.0222$ ; (d)  $Se = 0.65$ ,  $Sp = 0.9998$  and  $p_{TB} = 0.0233$ . SICCT positivity is '0' if NR or IR and '1' if R.

|          | SICCT Positivity |      |      |     | Total |
|----------|------------------|------|------|-----|-------|
|          | '0'              | %    | '1'  | %   |       |
| (a)      |                  |      |      |     |       |
| Healthy  | 86703            | 97.5 | 78   | 0.1 | 86781 |
| Diseased | 968              | 1.1  | 1183 | 1.3 | 2151  |
| Total    | 87861            |      | 1261 |     | 88932 |
| (b)      |                  |      |      |     |       |
| Healthy  | 86653            | 97.4 | 17   | 0.0 | 86671 |
| Diseased | 1018             | 1.1  | 1244 | 1.4 | 2261  |
| Total    | 87861            |      | 1261 |     | 88932 |
| (c)      |                  |      |      |     |       |
| Healthy  | 87034            | 97.9 | 78   | 0.1 | 87113 |
| Diseased | 637              | 0.7  | 1183 | 1.3 | 1819  |
| Total    | 87861            |      | 1261 |     | 88932 |
| (d)      |                  |      |      |     |       |
| Healthy  | 87001            | 97.8 | 17   | 0.0 | 87018 |
| Diseased | 670              | 0.8  | 1244 | 1.4 | 1914  |
| Total    | 87861            |      | 1261 |     | 88932 |
